# Supplementary material for: The effects of pectin on the gut microbiota and serum metabolites in mice fed with a high fat diet and exposed to low-dose antibiotics
Source: Royal Society of Chemistry journal article supplement (doi:10.1039/d2fo03966d), 2023-01-01
Supplement: d2fo03966d1.pdf [file d2fo03966d1.pdf]

1 **Food & Function**

2

3

Supplementary materials for

4

**The effects of pectin on the gut microbiota and serum metabolites in mice**

5

**fed a high fat diet and exposed to low-dose antibiotics**

6

7

Qianhuang Xiao, Wenqi Huang, Quanyong Wu, Hedi Xu, Yanli Zhang, Jingrui Yang, Shuigen Bian,

8

Huizi Tan\*, Shaoping Nie

9

10

(State Key Laboratory of Food Science and Technology, China-Canada Joint Laboratory of Food

11

Science and Technology (Nanchang), Key Laboratory of Bioactive Polysaccharides of Jiangxi

12

Province, Nanchang University, Nanchang 330047, China)

13

14

\* *Corresponding author: huizi.tan@ncu.edu.cn (H. Tan)*

15

16

17

**The Supplementary materials includes:**

18

**Supplemental Fig 1.** The effects of pectin with various degrees of esterification on the  $\alpha$ -diversity

19

of gut microbiota

20

**Supplemental Fig 2.** The effects of pectin with various degrees of esterification on the  $\beta$ -diversity

21

of gut microbiota based on sparse partial least squares discriminant analysis (sPLS-DA).

22

**Supplemental Fig 3.** The sparse partial least squares discriminant analysis (sPLS-DA) of the serum

23

metabolites of mice in each group.

24

**Supplemental Fig 4.** The correlation analysis of the gut microbiome, fasting blood glucose, and

25

the expression of hepatic SOD and colonic occludin of mice in each group.

26

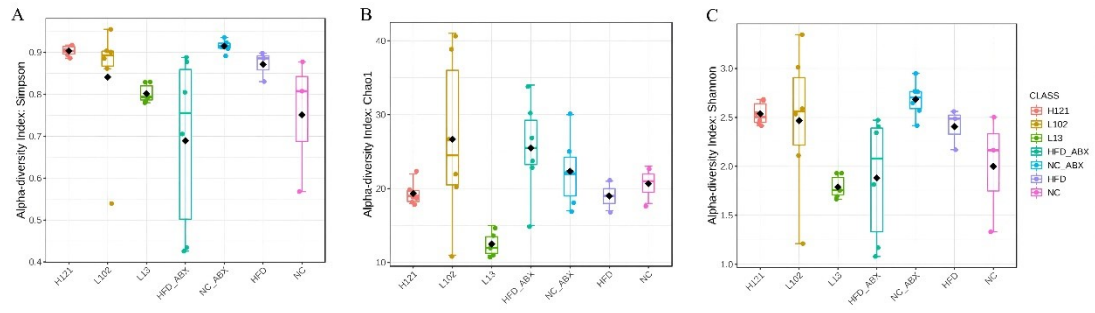

27

28 **Supplemental Fig 1.** The effects of pectin with various degrees of esterification on the  $\alpha$ -diversity  
 29 of gut microbiota

30

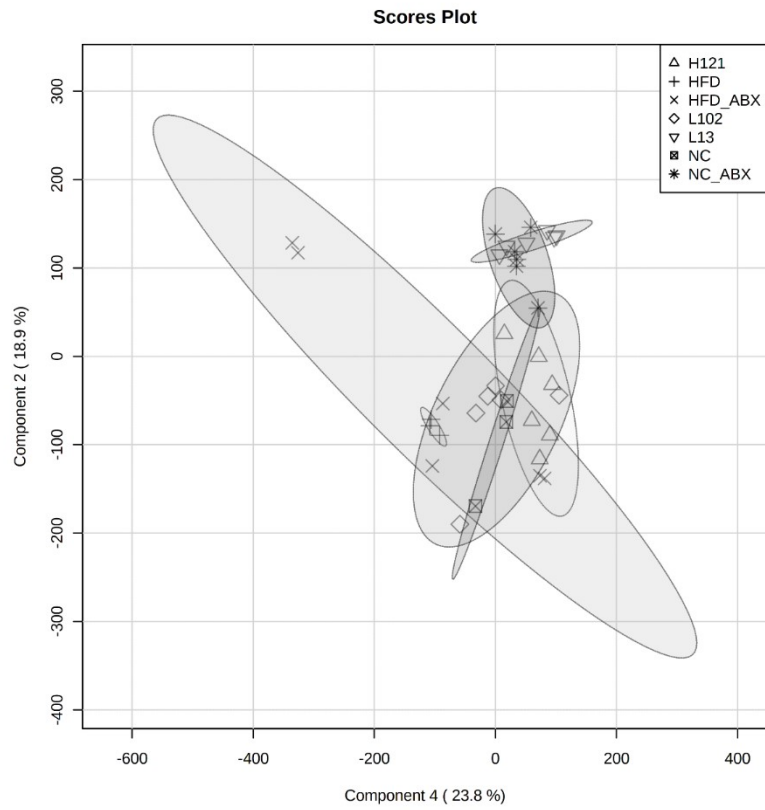

31

32 **Supplemental Fig 2.** The effects of pectin with various degrees of esterification on the  $\beta$ -diversity  
33 of gut microbiota based on sparse partial least squares discriminant analysis (sPLS-DA).

34

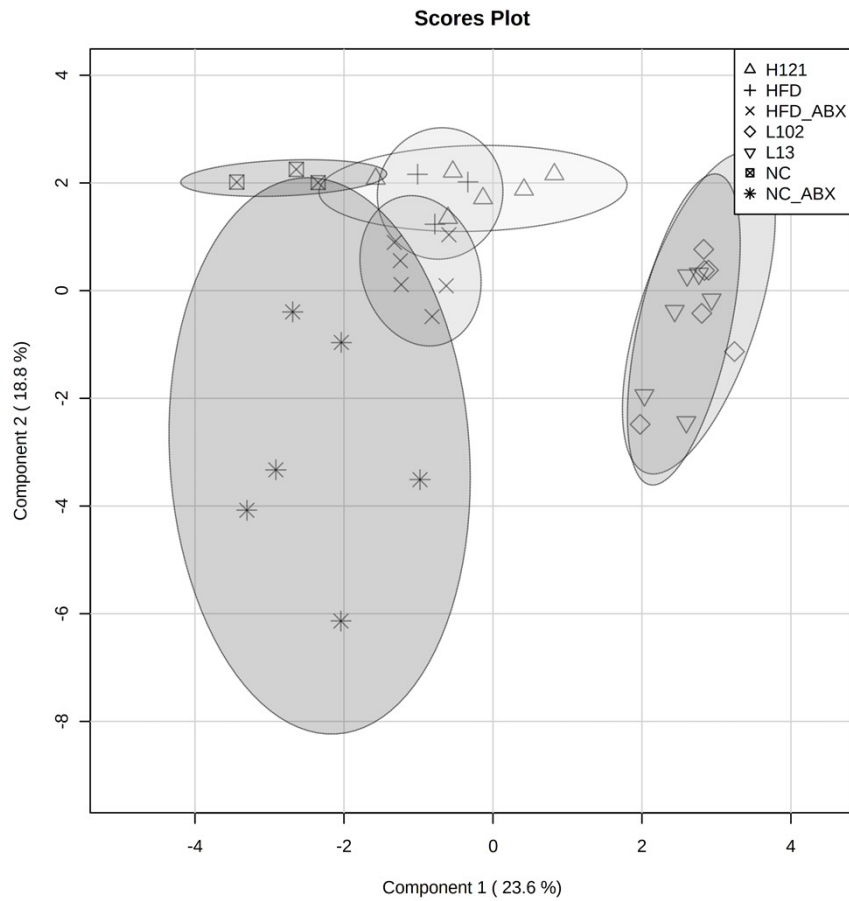

35

36 **Supplemental Fig 3.** The sparse partial least squares discriminant analysis (sPLS-DA) of the serum  
37 metabolites of mice in each group.

38

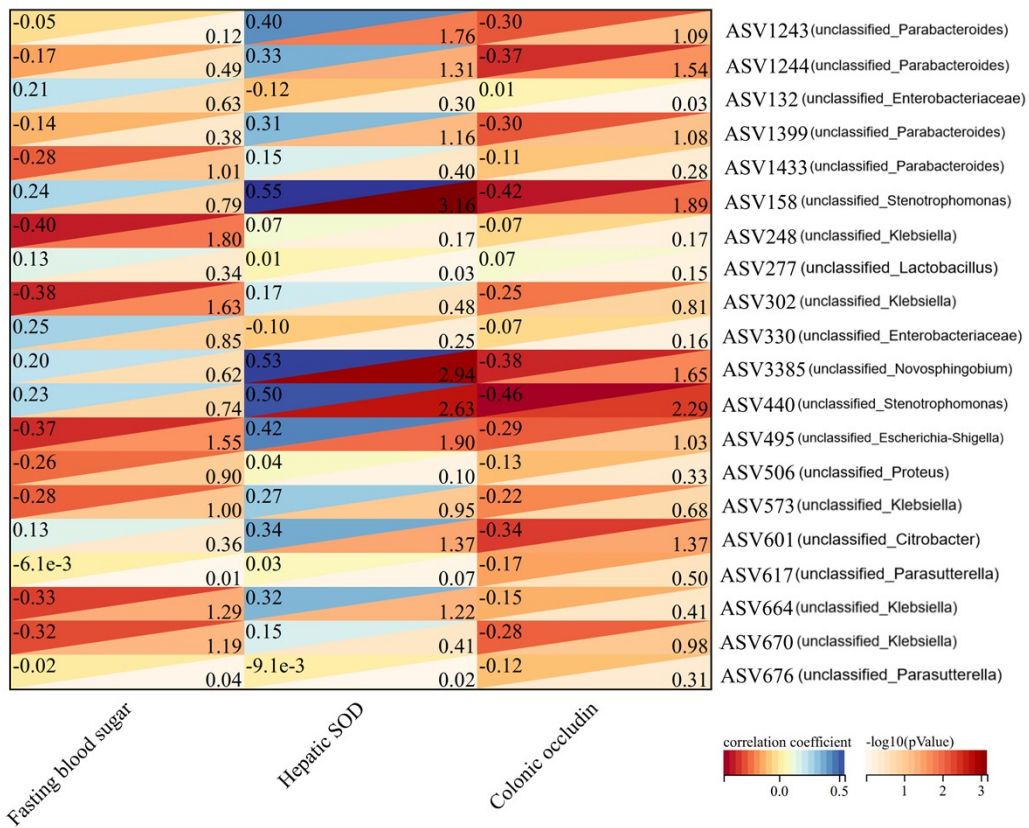

39

40 **Supplemental Fig 4.** The correlation analysis of the gut microbiome, fasting blood glucose, and  
 41 the expression of hepatic SOD and colonic occludin of mice in each group.
